# Supplementary material
Source: PubMed Central journal article supplement (PMC2777478)
Supplement: jn.109.110387_1.pdf [file jn.109.110387_1.pdf]

## Online Supporting Material

**Supplemental Table 1. Food Groupings Used in the Dietary Pattern Analysis<sup>1,2</sup>**

| <b>Foods or Food groups</b>                                 | <b>Food Items</b>                                                                                                                                                                                                                                       |
|-------------------------------------------------------------|---------------------------------------------------------------------------------------------------------------------------------------------------------------------------------------------------------------------------------------------------------|
| Store-bought meats and chicken, store-bought fatty meats    | Beef, pork or ham, chicken, bacon, sausage, Spam, hot dogs (wieners), luncheon meats                                                                                                                                                                    |
| Native sea and land mammals                                 | Walrus, seal, whale, oogrük (bearded seal), muktuk (whale skin with fat), reindeer, caribou, moose (All fresh or frozen)                                                                                                                                |
| Native birds                                                | Wild birds (fresh or frozen)                                                                                                                                                                                                                            |
| Fish                                                        | Salmon, white fish, other fish (All fresh or frozen.), smoked king salmon, other dried fish                                                                                                                                                             |
| Stew, mostly meat; stew, mostly rice/noodles                | Stew, mostly meat; stew, mostly rice or noodles                                                                                                                                                                                                         |
| Milk, cheese, ice cream, non-dairy creamer                  | Whole milk, cheese (American), ice cream, non-dairy creamer                                                                                                                                                                                             |
| Evaporated milk                                             | Evaporated milk (undiluted)                                                                                                                                                                                                                             |
| Eggs                                                        | Wild bird eggs, chicken eggs                                                                                                                                                                                                                            |
| Store-bought animal fats                                    | Butter, lard (fat from pork), bacon grease                                                                                                                                                                                                              |
| Native sea and land animal fats                             | Seal oil, rendered seal blubber, whale oil, seal blubber, walrus oil, reindeer fat, moose fat                                                                                                                                                           |
| Store-bought hydrogenated vegetable fats                    | Stick margarine, Crisco (solid)                                                                                                                                                                                                                         |
| Store-bought non-hydrogenated vegetable fats, peanut butter | Tub margarine, canola oil, other vegetable oil (corn, soy, etc.), mayonnaise, peanut butter                                                                                                                                                             |
| Flavored drinks                                             | HI-C, Tang, Hawaiian Punch, Kool-Aid                                                                                                                                                                                                                    |
| Wild berries, native berry <i>agutuk</i>                    | Blackberries or crowberries ( <i>Empetrum nigrum L.</i> ), blueberries, salmonberries or cloudberry ( <i>Rubus chamaemorus L.</i> ), berry <i>agutuk</i> (also known as Eskimo ice cream typically made with berries, a fat, and sugar or fish or meat) |
| Store-bought fruits, vegetables, and lettuce salad          | Oranges, apples, peaches or apricots, carrots, tomatoes (canned), green beans, corn, peas, tossed salad or lettuce                                                                                                                                      |
| Wild greens                                                 | Wild greens                                                                                                                                                                                                                                             |
| Beans dry                                                   | Beans, dry (cooked or canned)                                                                                                                                                                                                                           |
| French fries or fried potatoes                              | French fried potatoes, fried potatoes                                                                                                                                                                                                                   |
| White bread, pasta, rice, cold cereal, pilot bread          | White bread or rolls, pasta, noodles, macaroni, rice, cold cereal, Sailor Boy Pilot Bread                                                                                                                                                               |
| Sweet grains; doughnuts, cookies, pies, cakes; fry bread    | Doughnuts, cookies, pies, cakes, fry bread                                                                                                                                                                                                              |
| Pancakes                                                    | Pancakes                                                                                                                                                                                                                                                |
| Hot cereal                                                  | Hot cereal (oatmeal, etc.)                                                                                                                                                                                                                              |
| Snack chips, pizza                                          | Chips, pizza                                                                                                                                                                                                                                            |
| Candy bars, sugar, syrup                                    | Candy bars, sugar, syrup                                                                                                                                                                                                                                |
| Coffee, tea,                                                | Coffee, tea                                                                                                                                                                                                                                             |

|                 |                                                    |
|-----------------|----------------------------------------------------|
| Soda pop        | Soda pop                                           |
| Lower fat milks | 2% low fat milk, 1% low fat milk, Skim/nonfat milk |
| Bread dark      | Dark bread or rolls                                |

<sup>1</sup> Food items consumed by  $\leq 5\%$  of the study population were excluded. Oopah, a marine chordate of the subphylum, Tunicata, was consumed by only 2% of the participants.

<sup>2</sup> Other foods excluded, because only participants from St. Lawrence Island were asked about them, were kemagluk, mamaghwaaq, riighnak, and tukughnak (ascidians or marine chordates).
