# Supplementary material
Source: PubMed Central journal article supplement (PMC2777478)
Supplement: jn.109.110387_2.pdf [file jn.109.110387_2.pdf]

## Online Supporting Material

| <b>Supplemental Table 2. Factor loading matrix for Four Dietary Patterns, GOCADAN 2000-2004, n = 1066</b> |                                   |                               |                                            |                                      |
|-----------------------------------------------------------------------------------------------------------|-----------------------------------|-------------------------------|--------------------------------------------|--------------------------------------|
| Foods or food groups                                                                                      | Factor 1,<br>Traditional<br>Foods | Factor 2,<br>Western<br>Foods | Factor 3,<br>Purchased<br>Healthy<br>Foods | Factor 4,<br>Beverages<br>and Sweets |
| Store-bought meats and chicken,<br>store-bought fatty meats                                               | -0.15                             | 0.62                          | 0.19                                       | 0.12                                 |
| Native sea and land mammals                                                                               | 0.53                              | -0.06                         | -0.04                                      | -0.02                                |
| Native birds                                                                                              | 0.44                              | -0.06                         | -0.10                                      | 0.22                                 |
| Fish                                                                                                      | 0.54                              | -0.08                         | 0.08                                       | 0.06                                 |
| Stew, mostly meat; stew, mostly<br>rice/noodles                                                           | 0.50                              | 0.24                          | 0.02                                       | 0.21                                 |
| Milk, cheese, ice cream, non-dairy<br>creamer                                                             | -0.20                             | 0.20                          | 0.24                                       | 0.06                                 |
| Evaporated milk                                                                                           | 0.04                              | -0.44                         | -0.03                                      | -0.02                                |
| Eggs                                                                                                      | 0.07                              | 0.08                          | 0.06                                       | 0.39                                 |
| Store-bought animal fats                                                                                  | -0.10                             | -0.29                         | 0.18                                       | 0.19                                 |
| Native sea and land animal fats                                                                           | 0.34                              | -0.31                         | 0.07                                       | -0.03                                |
| Store-bought hydrogenated<br>vegetable fats                                                               | -0.02                             | -0.38                         | -0.07                                      | 0.00                                 |
| Store-bought non-hydrogenated<br>vegetable fats, peanut butter                                            | -0.22                             | 0.00                          | 0.39                                       | 0.00                                 |
| Flavored drinks                                                                                           | -0.19                             | -0.16                         | -0.54                                      | -0.13                                |
| Wild berries, native berry <i>agutuk</i>                                                                  | 0.40                              | -0.15                         | 0.07                                       | -0.12                                |
| Store-bought fruits, vegetables,<br>and lettuce salad                                                     | 0.04                              | 0.05                          | 0.38                                       | -0.40                                |
| Wild greens                                                                                               | 0.41                              | -0.12                         | 0.09                                       | -0.05                                |
| Beans dry                                                                                                 | 0.09                              | 0.11                          | 0.47                                       | -0.07                                |
| French fries or fried potatoes                                                                            | -0.09                             | 0.40                          | 0.01                                       | -0.07                                |
| White bread, pasta, rice, cold<br>cereal, pilot bread                                                     | -0.10                             | -0.06                         | 0.08                                       | -0.36                                |
| Sweet grains: doughnuts, cookies,<br>pies, cakes, fry bread                                               | 0.06                              | -0.03                         | 0.12                                       | -0.05                                |
| Pancakes                                                                                                  | 0.17                              | -0.28                         | -0.02                                      | 0.23                                 |
| Hot cereal                                                                                                | 0.15                              | -0.28                         | 0.31                                       | -0.17                                |
| Snack chips, pizza                                                                                        | -0.12                             | 0.48                          | -0.32                                      | -0.16                                |
| Candy bars, sugar syrup                                                                                   | -0.31                             | -0.10                         | -0.02                                      | 0.49                                 |
| Coffee, tea                                                                                               | -0.15                             | -0.18                         | 0.16                                       | 0.61                                 |
| Soda pop                                                                                                  | -0.09                             | 0.33                          | -0.52                                      | 0.00                                 |
| Lower fat milks                                                                                           | -0.17                             | 0.08                          | 0.18                                       | -0.36                                |
| Bread, dark                                                                                               | -0.07                             | 0.03                          | 0.40                                       | 0.00                                 |
